# Supplementary material
Source: PubMed Central journal article supplement (PMC5609489)
Supplement: NIHMS903018-supplement.pdf [file NIHMS903018-supplement.pdf]

# Suppl Figure S1

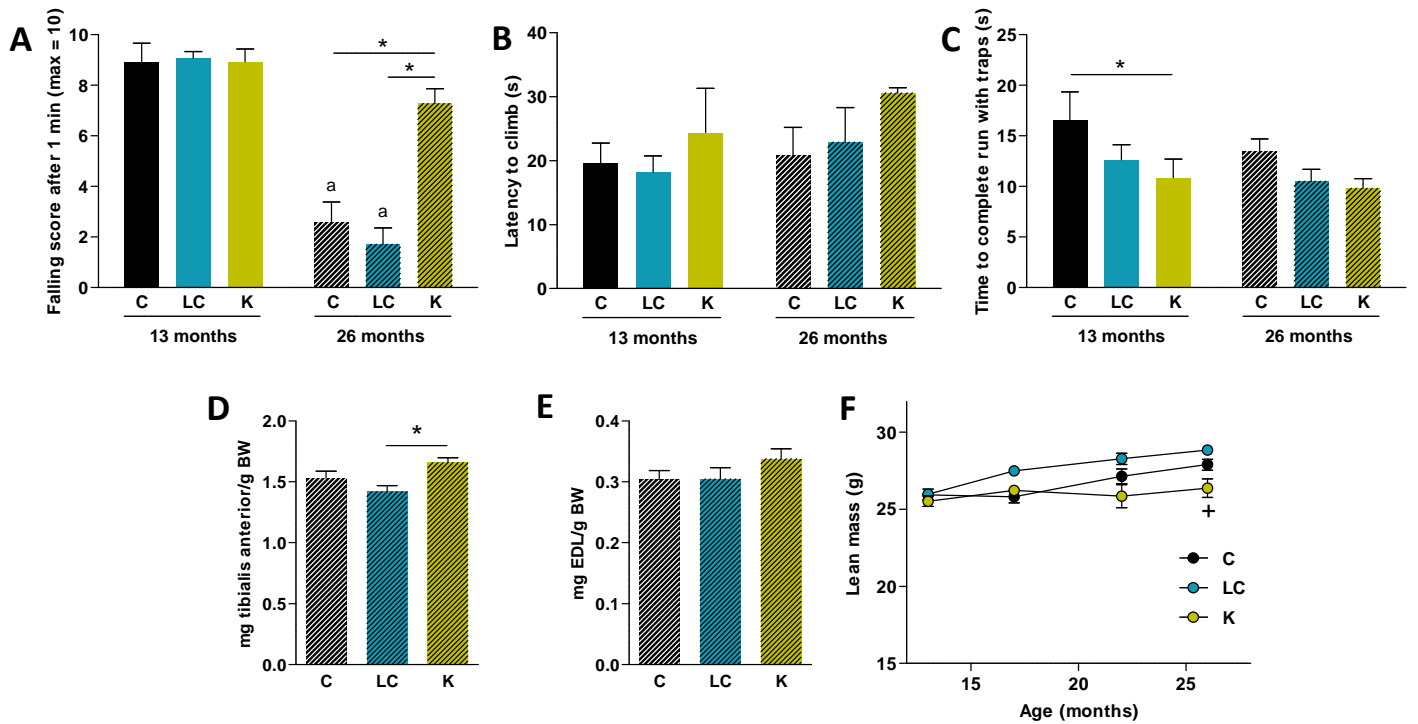

**Figure S1. Physical performance, behavior and physiology in male mice fed low-carbohydrate diets. Related to Figures 1 and 2.** (A) Hanging wire test: falling score after 1 min, maximum = 10. (B) Rearing test: latency to climb or time until the first rearing behavior event is observed. (C) Locotronic test: time to complete a run when 3 traps are included in the test. Relative muscle mass of (D) tibialis anterior and (E) extensor digitorum longus after 14 months of dietary interventions. (F) Lean mass from 1 to 14 months of dietary interventions (n = 15); + indicates lower lean mass in the ketogenic group compared to the rest of diets.

\* indicates a difference ( $p < 0.05$ ) between diets.

<sup>a</sup> indicates a difference ( $p < 0.05$ ) between 13-mo and 26-mo for the same diet.

# Suppl Figure S2

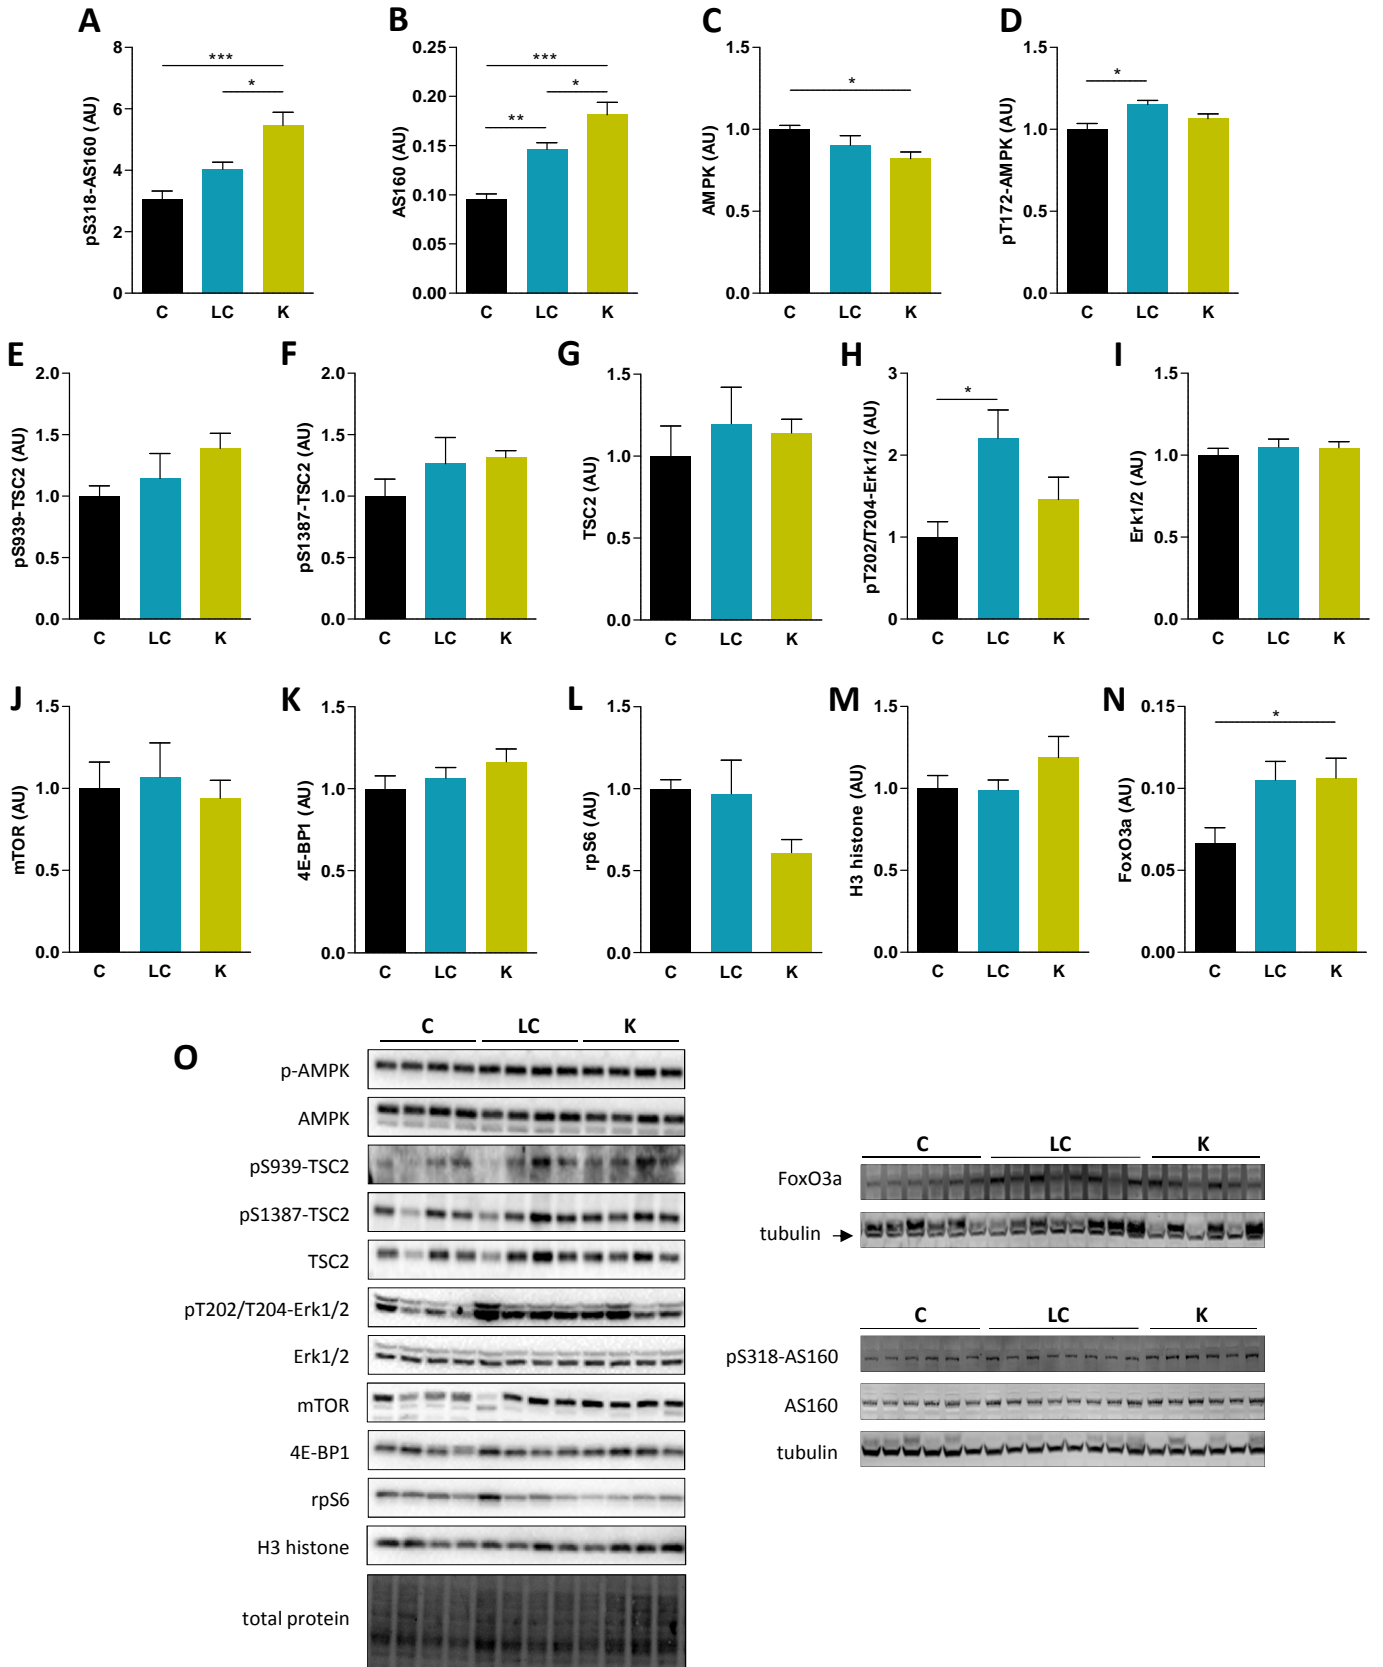

**Figure S2. Alterations in nutrient sensing pathways in the liver of male mice after 1 month of diet. Related to Figures 2 and 3.** Quantification of (A) p-AS160, (B) AS160, (C) AMPK, (D) p-AMPK, (E) pS939-TSC2, (F) pS1387-TSC2, (G) TSC2, (H) p-Erk1/2, (I) Erk1/2, (J) mTOR, (K) 4E-BP1, (L) rpS6, (M) H3 histone and (N) FoxO3a protein levels after analysis by western blot (n = 4-8). (O) Representative blots are shown for each of the quantified proteins. A representative loading control is shown for those blots with n = 4, corresponding to the p-AMPK and AMPK gel. \* indicates a difference ( $p < 0.05$ ) between diets.

## Suppl Figure S3

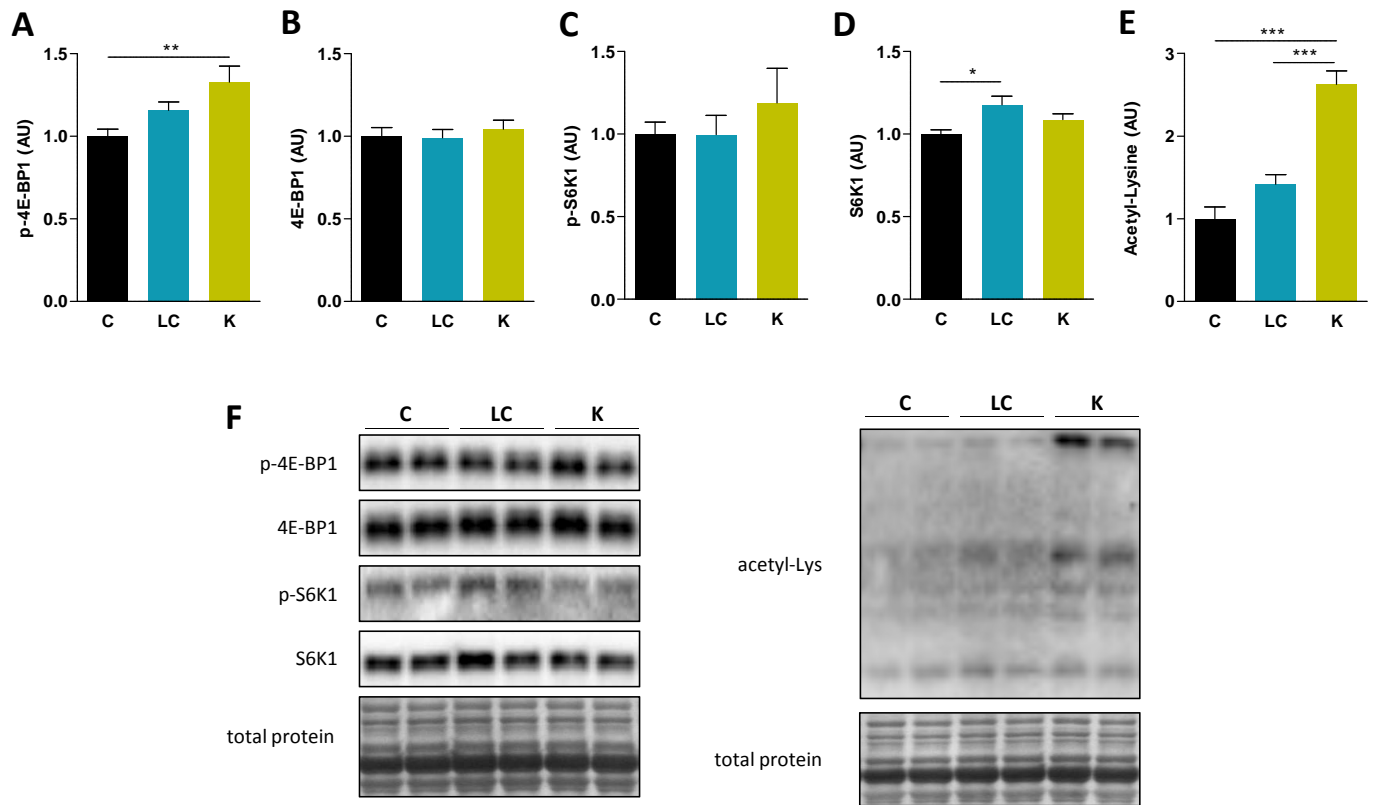

**Figure S3. Alterations in mTORC1 signaling and protein acetylation in the skeletal muscle of male mice after 1 month of diet. Related to Figure 3.**

Quantification of (A) p-4E-BP1, (B) 4E-BP1, (C) p-S6K1, (D) S6K1 and (E) acetyl-Lysine protein levels. Representative lanes and loading controls are shown (n = 6). Loading controls are shown, corresponding to the 4E-BP1 and S6K1 gel and the protein acetylation gel.

\* indicates a difference ( $p < 0.05$ ) between diets.

**Table S1: pathology at time of death in male C57BL/6 mice consuming a ketogenic, LC or control diet. Related to Figure 1.** § Indicates differences with CT-KT ( $p < 0.1$ ). ‡ Indicates differences with CT-LC ( $p < 0.1$ ). # Indicates differences with LC-KT ( $p < 0.1$ ). n =10. EMH = extramedullary hematopoiesis. *Italic font is used for specific tumor types.*

|                               | diet           |                |                |                                 | diet            |                |   |
|-------------------------------|----------------|----------------|----------------|---------------------------------|-----------------|----------------|---|
|                               | C              | LC             | K              |                                 | C               | LC             | K |
| <b>Kidney</b>                 |                |                |                | <b>Lung/trachea (cont.)</b>     |                 |                |   |
| Chronic nephropathy           | 10             | 10             | 10             | <i>Pulmonary adenocarcinoma</i> | 1               | 1              | 0 |
| Tubular mineralization        | 8              | 8              | 9              | <i>Mast cell tumor</i>          | 0               | 0              | 0 |
| Glomerular amyloidosis        | 1              | 0              | 1              | <i>Histiocytic sarcoma</i>      | 3               | 1              | 0 |
| <i>Histiocytic sarcoma</i>    | 0              | 1              | 0              | <i>Pulmonary adenoma</i>        | 3               | 0              | 1 |
| <i>Pleomorphic lymphoma</i>   | 0              | 1              | 0              | Neoplasia total                 | 6               | 4              | 2 |
| <i>Mast cell tumor</i>        | 0              | 1              | 0              |                                 |                 |                |   |
| <i>Hemangiosarcoma</i>        | 0              | 1              | 0              | <b>Heart/great vessels</b>      |                 |                |   |
| Neoplasia total               | 0              | 4 <sup>‡</sup> | 0 <sup>#</sup> | Myocardial hypertrophy          | 7               | 2 <sup>‡</sup> | 4 |
|                               |                |                |                | Atrial dilation                 | 0               | 0              | 2 |
| <b>Pancreas</b>               |                |                |                | Myocardial degeneration         | 10 <sup>§</sup> | 8              | 6 |
| Exocrine atrophy              | 1              | 3              | 2              | Great vessel mineralization     | 2               | 0              | 0 |
| Lymphocytic pancreatitis      | 1              | 1              | 2              | Interstitial fibrosis           | 0               | 0              | 2 |
|                               |                |                |                | Ventricular dilation            | 0               | 2              | 3 |
| <b>Spleen</b>                 |                |                |                | Myocardial mineralization       | 4               | 0 <sup>‡</sup> | 1 |
| EMH                           | 7              | 7              | 7              |                                 |                 |                |   |
| Lymphoid depletion            | 9 <sup>§</sup> | 7              | 4              | <b>Thymus</b>                   |                 |                |   |
| <i>Angiosarcoma</i>           | 0              | 1              | 1              | Atrophy                         | 7               | 5              | 5 |
| <i>Pleomorphic lymphoma</i>   | 0              | 1              | 1              |                                 |                 |                |   |
| <i>Histiocytic sarcoma</i>    | 4 <sup>§</sup> | 4              | 0 <sup>#</sup> | <b>Stomach</b>                  |                 |                |   |
| Neoplasia total               | 4              | 6              | 2              | Hyperkeratosis                  | 5               | 6              | 6 |
|                               |                |                |                | Ulceration                      | 8               | 9              | 6 |
| <b>Liver</b>                  |                |                |                | Luminal hemorrhage              | 9               | 9              | 7 |
| Ito cell hyperplasia          | 8              | 8              | 8              |                                 |                 |                |   |
| Lipogranulomas                | 10             | 10             | 10             | <b>Brain</b>                    |                 |                |   |
| Hepatic infarction            | 0              | 1              | 1              | Thalamic mineralization         | 1               | 0              | 2 |
| EMH                           | 5              | 4              | 5              |                                 |                 |                |   |
| Oval cell hyperplasia         | 2              | 0              | 2              | <b>Lower urinary tract</b>      |                 |                |   |
| Lipidosis                     | 3              | 5              | 5              | Protein in bladder lumen        | 0               | 2              | 1 |
| Kupffer cell hyperplasia      | 10             | 10             | 10             | Dilated bladder                 | 1               | 0              | 2 |
| Biliary hyperplasia           | 4              | 3              | 2              | Lymphocytic cystitis            | 0               | 2              | 0 |
| Telangiectasis                | 3              | 3              | 4              | Necrotizing cystitis            | 2               | 0              | 0 |
| Lobular atrophy               | 10             | 10             | 10             |                                 |                 |                |   |
| <i>Histiocytic sarcoma</i>    | 6 <sup>§</sup> | 4              | 1              | <b>Reproductive tract</b>       |                 |                |   |
| <i>Pleomorphic lymphoma</i>   | 0              | 1              | 1              | Necrotizing prostatitis         | 2               | 0              | 2 |
| <i>Mast cell tumor</i>        | 0              | 1              | 0              | Testicular atrophy              | 6               | 3              | 5 |
| <i>Hepatic adenoma</i>        | 1              | 0              | 0              | Seminal vesicular dilation      | 7               | 10             | 4 |
| Neoplasia total               | 7 <sup>§</sup> | 6              | 2              | Seminal vasculitis              | 2               | 0              | 1 |
|                               |                |                |                |                                 |                 |                |   |
| <b>Lung/trachea</b>           |                |                |                | <b>Neoplasia (in any organ)</b> |                 |                |   |
| Hemosiderosis                 | 3              | 4              | 2              | <i>Histiocytic sarcoma</i>      | 6 <sup>§</sup>  | 6 <sup>#</sup> | 1 |
| Pneumonia/pleuritis           | 2              | 2              | 3              | Other cancer/tumor              | 4               | 5              | 4 |
| Perivascular                  |                |                |                | Any kind of tumor               | 8               | 9 <sup>#</sup> | 4 |
| lymphoplasmacytic infiltrates | 4              | 6              | 6              |                                 |                 |                |   |

**Table S2: influence of diet and age on serum markers of lipid metabolism and inflammation. Related to Figure 2.** Values that do not contain the same superscript letter differ ( $p < 0.05$ ) between diets within an age group; values that contain \* indicate a difference ( $p < 0.05$ ) between ages in a given diet group. ‡ For FGF21, n = 6 at 13 months and n = 4 at 26 months of age.

|                           | 13 months      |                 |                  | 26 months              |                        |                        |
|---------------------------|----------------|-----------------|------------------|------------------------|------------------------|------------------------|
|                           | Control<br>n=8 | Low-carb<br>n=8 | Ketogenic<br>n=8 | Control<br>n=6         | Low-carb<br>n=4        | Ketogenic<br>n=8       |
| Triglycerides (mg/dl)     | 77.1±8.6       | 68.6±7.5        | 64.0±3.1         | 39.3±3.5*              | 42.3±6.5*              | 42.8±5.7               |
| Total cholesterol (mg/dl) | 206.8±8.6      | 199.4±9.8       | 199.5±21.1       | 158.9±37.2             | 155.6±40.2             | 192.7±38.3             |
| HDL-C (mg/dl)             | 160.5±9.2      | 166.5±8.0       | 170.0±19.4       | 114.6±22.8             | 120.5±34.0             | 159.5±32.7             |
| LDL-C+VLDL-C (mg/dl)      | 46.3±2.8       | 32.9±5.7        | 29.5±3.0         | 44.3±15.0              | 35.0±7.1               | 33.2±7.6               |
| Free fatty acids (mEq/l)  | 0.51±0.03      | 0.47±0.03       | 0.44±0.03        | 0.34±0.06 <sup>b</sup> | 0.57±0.20 <sup>a</sup> | 0.32±0.02 <sup>b</sup> |
| FGF21 (ng/ml) ‡           | 1.21±0.37      | 0.51±0.49       | 3.04±4.22        | 3.02±4.24              | 0.39±0.20              | 1.25±1.55              |
| IL-6 (pg/ml)              | 29.1±6.3       | 12.6±1.7        | 15.5±2.0         | 311.2±243.8            | 220.3±122.3            | 64.9±19.3              |
| CXCL1 (pg/ml)             | 99.2±6.7       | 100.7±4.4       | 95.6±5.5         | 282.4±79.5*            | 238.5±118.1            | 167.7±27.9             |
| TNF- $\alpha$ (pg/ml)     | 13.1±1.6       | 14.3±1.3        | 17.4±2.0         | 34.0±10.5*             | 26.8±11.4              | 23.4±2.9               |

**Table S3: influence of diet and age on average 24 hour energy expenditure (EE), respiratory quotient (RQ) and physical activity. Related to Figure 2.** BW, body weight; LM, lean mass; EE is expressed as EE kJ/mouse/h and EE<sub>BW</sub> and EE<sub>LM</sub> (kJ normalized by BW and LM). Values that do not contain the same superscript letter differ between diets within an age group; values that contain \* indicate a difference between ages in a given diet group; Bonferroni corrected p values are provided. X-TOT = number of x-axis infrared (IR) beam breaks; X-AMB = number of consecutive x-axis IR beam breaks; Z-TOT = number of z-axis IR beam breaks

|                               | 13 months              |                         |                        | 26 months              |                        |                        | p value |        |
|-------------------------------|------------------------|-------------------------|------------------------|------------------------|------------------------|------------------------|---------|--------|
|                               | Control<br>n=7         | Low-carb<br>n=7         | Ketogenic<br>n=6       | Control<br>n=4         | Low-carb<br>n=6        | Ketogenic<br>n=5       | Diet    | Age    |
| RQ                            | 0.90±0.01 <sup>a</sup> | 0.77±0.01 <sup>b</sup>  | 0.72±0.01 <sup>c</sup> | 0.90±0.01 <sup>a</sup> | 0.77±0.01 <sup>b</sup> | 0.73±0.01 <sup>c</sup> | <0.001  | 0.918  |
| EE (kJ/hr)                    | 1.88±1.04              | 1.98±0.06               | 2.00±0.05              | 1.66±0.12              | 1.80±0.07              | 1.77±0.05              | 0.139   | <0.001 |
| EE <sub>BW</sub><br>(kJ/g/hr) | 0.062±<br>0.001        | 0.065±<br>0.003         | 0.065±<br>0.002        | 0.055±<br>0.002*       | 0.054±<br>0.002*       | 0.061±<br>0.003        | 0.063   | <0.001 |
| EE <sub>LM</sub><br>(kJ/g/hr) | 0.083<br>±0.002        | 0.086<br>±0.004         | 0.089<br>±0.002        | 0.064<br>±0.002*       | 0.063<br>±0.002*       | 0.070<br>±0.003*       | 0.140   | <0.001 |
| X-TOT Light                   | 19.7±4.3               | 19.1±3.2                | 22.1±4.7               | 27.8±4.3               | 29.5±5.3               | 35.0±4.7               | 0.519   | 0.008  |
| X-TOT Dark                    | 23.6±3.4 <sup>a</sup>  | 34.3±5.0 <sup>a,b</sup> | 42.0±6.8 <sup>b</sup>  | 28.5±9.7               | 32.8±2.8               | 32.4±2.0               | 0.121   | 0.628  |
| X-AMB Light                   | 6.7±2.2                | 6.9±1.7                 | 6.9±2.5                | 8.9±2.4                | 9.6±3.1                | 9.6±1.5                | 0.970   | 0.203  |
| X-AMB Dark                    | 8.0±1.3 <sup>a</sup>   | 15.0±2.5 <sup>a,b</sup> | 18.1±4.5 <sup>b</sup>  | 9.7±4.1                | 11.2±1.6               | 9.3±1.6                | 0.200   | 0.119  |
| Z-TOT Light                   | 1.8±0.8                | 2.9±1.4                 | 1.8±1.0                | 4.8±2.2                | 2.8±0.8                | 3.8±1.2                | 0.894   | 0.123  |
| Z-TOT Dark                    | 2.2±0.5                | 6.5±1.9                 | 6.3±1.8                | 6.0±2.2                | 4.3±0.9                | 4.4±1.0                | 0.629   | 0.938  |
